# Supplementary material
Source: MDPI journal article supplement (https://www.mdpi.com/2227-9717/10/11/2385)
Supplement: s1 [file s1 › processes-2008170-Supplementary Materials.pdf]

## Supplementary Materials

R1

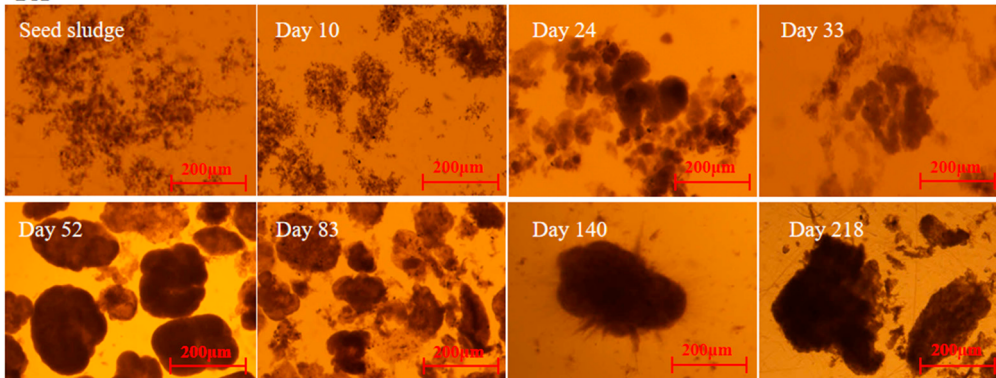

(A)

R2

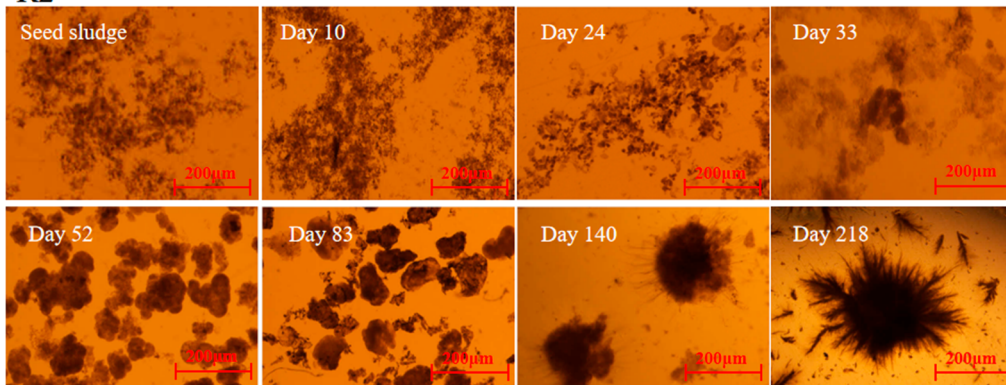

(B)

**Figure S1.** Morphology of the aerobic granules in R1 and R2 during the long-term operation period. (A) in R1; (B) in R2.

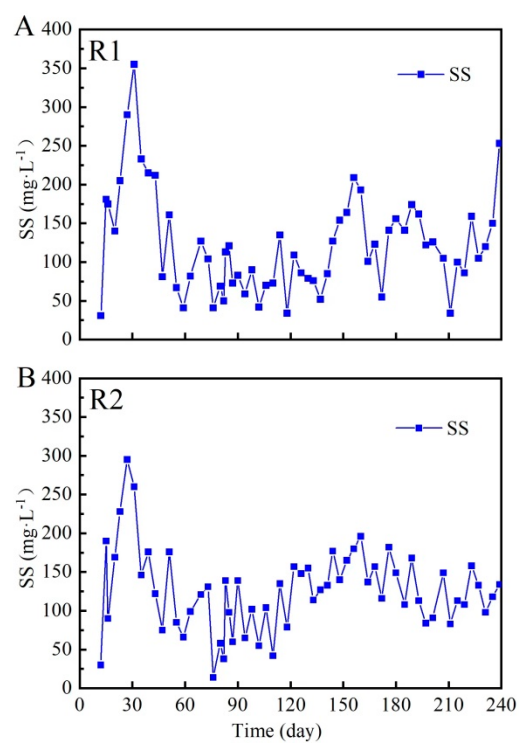

**Figure S2.** SS in the effluent from R1 and R2.

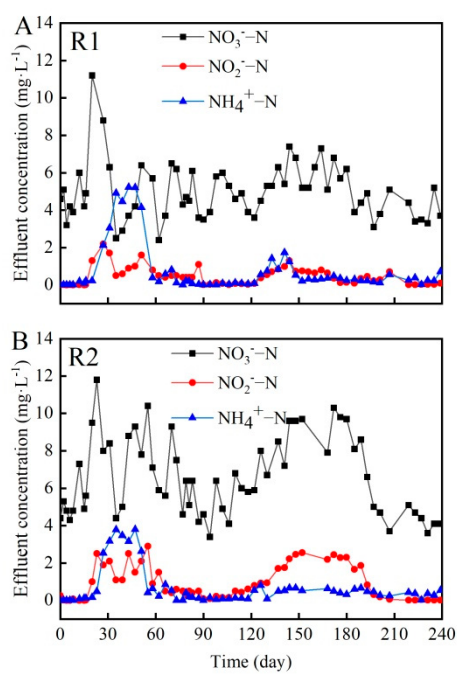

**Figure S3.** Ammonia, nitrite, and nitrate in the effluent from R1 and R2.
